# Supplementary material for: Epigenetic regulation of planarian stem cells by the SET1/MLL family of histone methyltransferases
Source: PubMed Central journal article supplement — Epigenetics. 2013 Jan 1;8(1):79–91. doi: 10.4161/epi.23211 (PMC3549883; doi:10.4161/epi.23211), 2013-01-01
Supplement: epi-8-79-s01.pdf [file epi-8-79-s01.pdf]

## **Supplemental Material to:**

**Amy Hubert, Jordana M. Henderson, Kelly G. Ross,  
Martis W. Cowles, Jessica Torres and Ricardo M. Zayas**

**Epigenetic regulation of planarian stem cells  
by the SET1/MLL family of histone methyltransferases**

**Epigenetics 2013; 8(1)**

**<http://dx.doi.org/10.4161/epi.23211>**

**<http://www.landesbioscience.com/journals/epigenetics/article/23211>**

## SUPPLEMENTARY INFORMATION

### Supplementary Methods

#### **Quantitative real-time polymerase chain reaction (qPCR)**

RNA was extracted with Trizol reagent (Invitrogen) from control worms and irradiated worms three days after treatment with 60 Gy of  $\gamma$ -irradiation. Samples were treated with TURBO DNA-free (Ambion) and then further purified using the RNeasy MinElute cleanup kit (Qiagen). cDNA was synthesized with GoScript Reverse Transcriptase (Promega) with an oligo dT<sub>15</sub> primer. qPCR was performed on a Bio-Rad CFX Connect Real-Time System using SsoAdvanced SYBR Green Supermix (Bio-Rad) with a two-step cycling protocol and annealing/extension temperature of 58.5°C. Two technical replicate PCRs were performed on each of two separate control and irradiated sample sets. The relative amount of each *set1/mlI* family target was normalized to that of *Smed- $\beta$ -tubulin* (DN305397)<sup>77</sup> for each sample and averaged across the technical replicates before comparing between biological replicates.

### Supplementary Figures

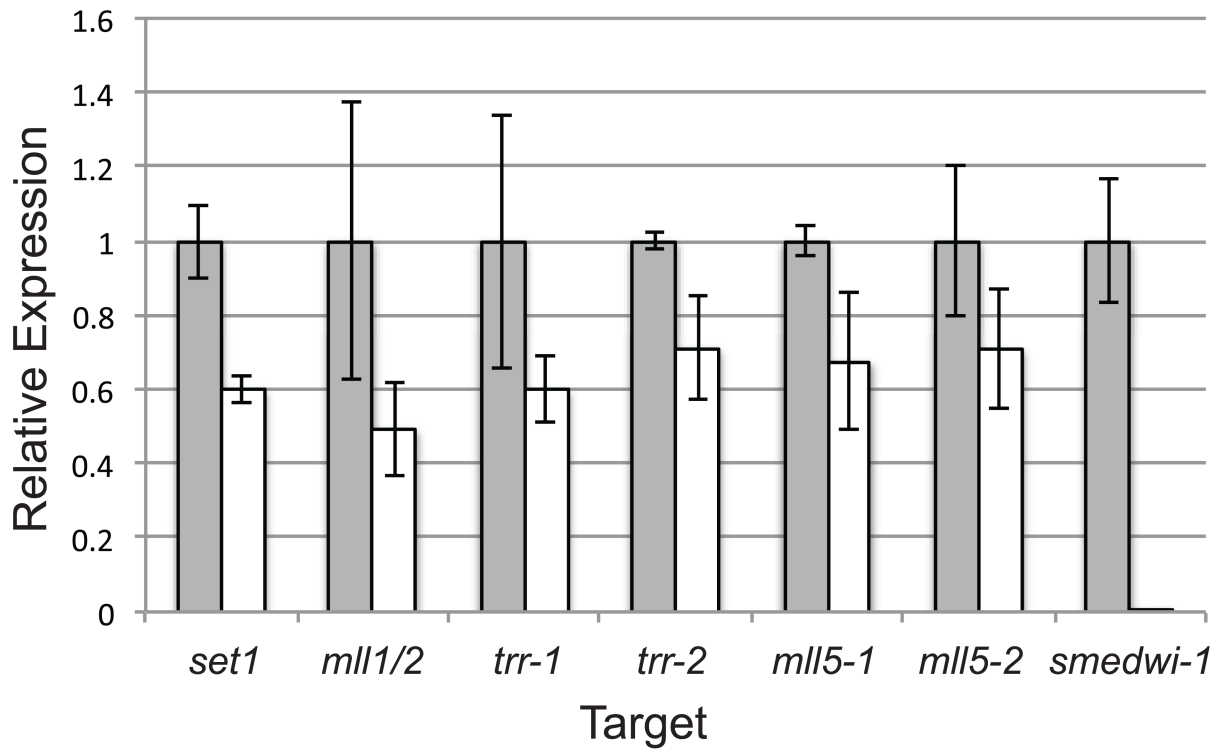

**Figure S1: Reduction of *set1/mll* family mRNA expression following  $\gamma$ -irradiation.** Relative expression levels of *set1/mll* gene family members measured in samples from control animals or animals treated with 60 Gy of  $\gamma$ -irradiation. Graphs show the mean of two biological replicates  $\pm$  standard deviation, proportionately scaled to set the control means equal to one. *Smedwi-1*, which is expressed exclusively in the stem cells, was used a positive control for the  $\gamma$ -irradiation.

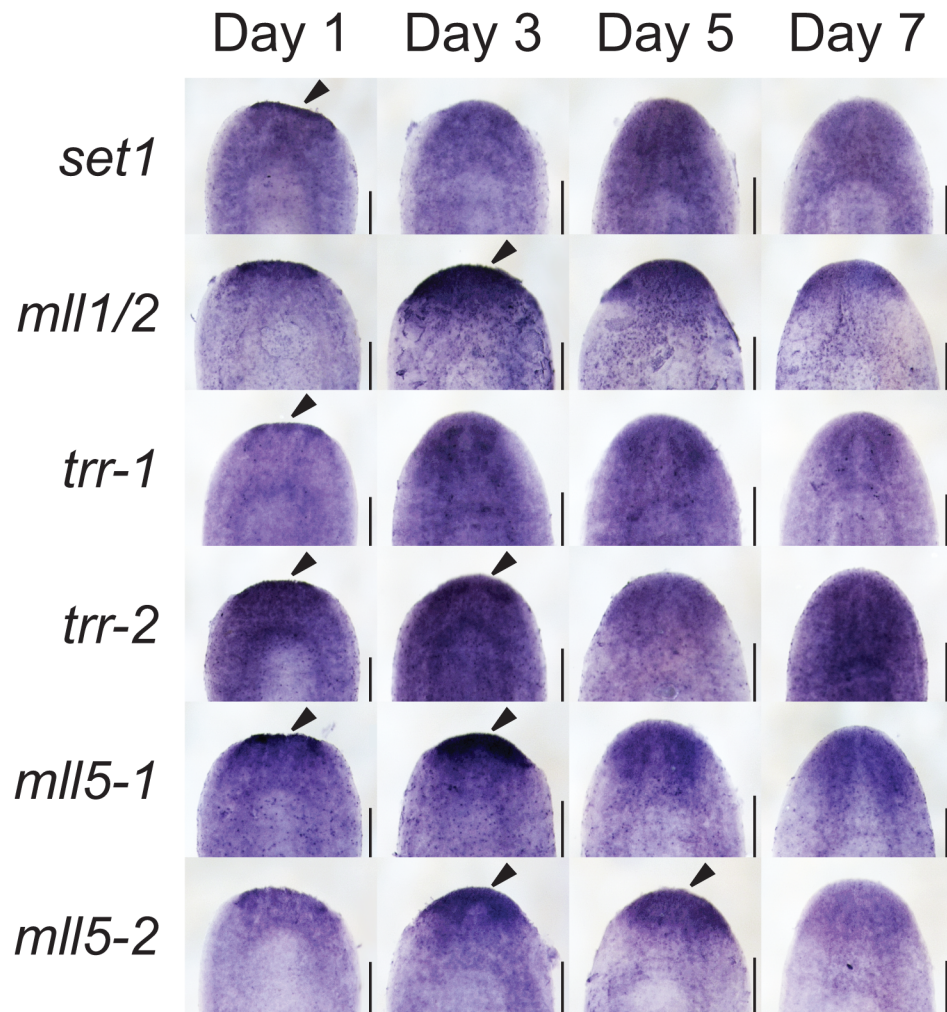

**Figure S2: *set1/mll* mRNA expression patterns during regeneration.** Whole-mount *in situ* hybridization to *set1/mll* family genes over a time course of regeneration. Images show the regenerating heads of trunk pieces that were amputated anterior to the pharynx fixed after the indicated number of days. Arrowheads point to blastema expression on the day(s) that show the strongest up-regulation in that tissue. Scale bars = 250  $\mu$ m.

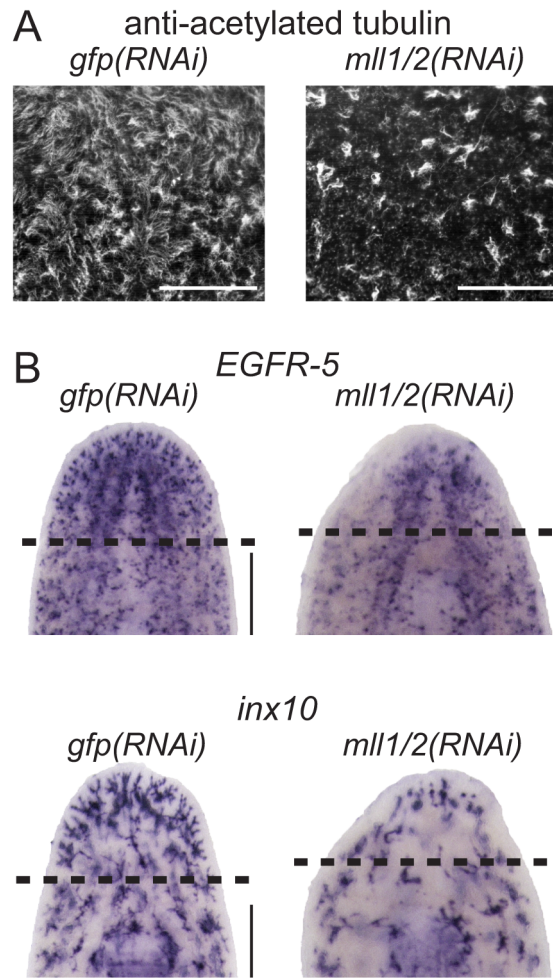

**Figure S3: Effect of *Smed-mll1/2* RNAi on the ventral cilia and protonephridia.** Planarians were fed six times over three weeks, amputated anterior to the pharynx, and allowed to regenerate for 10 days. (A) Anti-acetylated tubulin staining of the ventral cilia in *gfp(RNAi)* and *Smed-mll1/2(RNAi)* animals. The images were taken in an area to the right side of the pharynx. Scale bars = 100  $\mu$ m. (B) Whole mount *in situ* hybridization to markers of ciliated portions of the protonephridia in *gfp(RNAi)* and *Smed-mll1/2(RNAi)* animals. Dashed lines indicate the plane of amputation. Scale bars = 250  $\mu$ m.

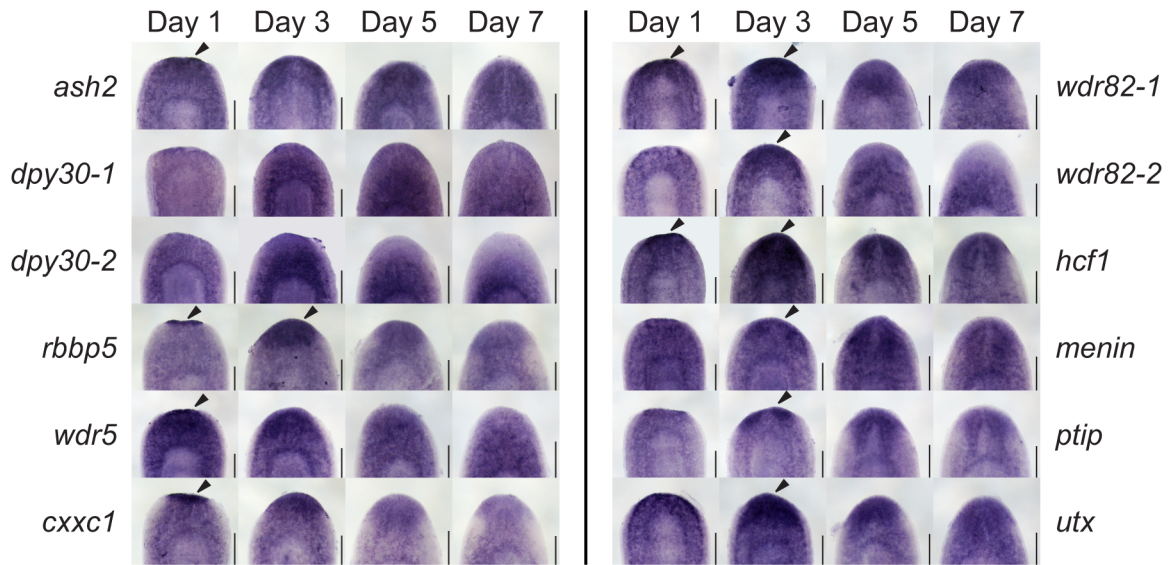

**Figure S4: COMPASS expression during regeneration.** Whole-mount *in situ* hybridization to COMPASS genes during a time course of regeneration. Worms were amputated anterior to the pharynx and fixed after the indicated number of days. The regenerating heads of trunk fragments are shown, and arrowheads point to blastemas with the highest up-regulation of expression. Scale bars = 250  $\mu$ m.

**Table S1: Summary of published transcriptome data for planarian *set1/mll* and COMPASS complex genes**

| Gene                | Önal <i>et al.</i><br>Gene cluster | Resch <i>et al.</i> |         |                | Labbé <i>et al.</i> |         |                | Class                |
|---------------------|------------------------------------|---------------------|---------|----------------|---------------------|---------|----------------|----------------------|
|                     |                                    | Stem cells          | Progeny | Differentiated | Stem cells          | Progeny | Differentiated |                      |
| <i>Smed-set1</i>    | 1, 2                               | 35.58               | 19.15   | 20.30          | 17.74               | 21.63   | 7.43           | --                   |
| <i>Smed-mll1/2</i>  | 1                                  | 73.96               | 49.33   | 30.91          | 67.28               | 77.20   | 11.41          | SC+prog              |
| <i>Smed-trr-1</i>   | 1                                  | --                  | --      | --             | 53.04               | 66.51   | 21.40          | --                   |
| <i>Smed-trr-2</i>   | 1                                  | --                  | --      | --             | 21.59               | 37.42   | 11.22          | --                   |
| <i>Smed-mll5-1</i>  | 1                                  | 45.68               | 33.83   | 32.80          | 25.45               | 41.15   | 13.58          | --                   |
| <i>Smed-mll5-2</i>  | 1                                  | 83.22               | 59.79   | 64.57          | --                  | --      | --             | --                   |
| <i>Smed-ash2</i>    | 1                                  | 29.09               | 17.63   | 14.63          | 73.61               | 49.22   | 12.39          | SC-enriched          |
| <i>Smed-dpy30-1</i> | 4                                  | --                  | --      | --             | 1.30                | 0.55    | 6.14           | --                   |
| <i>Smed-dpy30-2</i> | 1                                  | --                  | --      | --             | --                  | --      | --             | --                   |
| <i>Smed-rbbp5</i>   | 1                                  | 152.59              | 104.51  | 65.02          | 91.42               | 61.07   | 14.61          | SC+prog, SC-enriched |
| <i>Smed-wdr5</i>    | 1                                  | 14.65               | 11.73   | 11.27          | 93.44               | 68.99   | 19.57          | --                   |
| <i>Smed-cxxc1</i>   | 1                                  | 108.04              | 51.36   | 45.61          | 24.02               | 18.90   | 7.35           | --                   |
| <i>Smed-wdr82-1</i> | 1                                  | 160.08              | 107.05  | 83.74          | 117.80              | 103.55  | 17.80          | SC+prog              |
| <i>Smed-wdr82-2</i> | 1                                  | 270.41              | 64.06   | 77.34          | 140.55              | 38.80   | 8.11           | SC-enriched          |
| <i>Smed-hcf1</i>    | 1                                  | 89.61               | 31.77   | 31.23          | 122.78              | 88.66   | 20.06          | SC-enriched          |
| <i>Smed-menin</i>   | 1                                  | 22.15               | 9.60    | 13.95          | 15.29               | 15.39   | 7.90           | --                   |
| <i>Smed-ptip</i>    | 1, 3, 5                            | 11.71               | 11.77   | 10.56          | 20.45               | 52.66   | 21.53          | --                   |
| <i>Smed-utx</i>     | 1                                  | 113.34              | 66.15   | 61.61          | 42.72               | 54.77   | 13.02          | --                   |

Transcripts matching *set1/mll* or COMPASS genes were identified in each of three recently published transcriptomes by tblastn with the predicted full-length proteins. When more than one transcript was found for the same gene, the results were averaged. Önal *et al.* classified genes into one of six clusters based on their patterns of expression. Most of the *set1/mll* and COMPASS genes fall into Cluster 1, which contains the genes that are most highly expressed in stem cells. Average RPKM (reads per kilobase per million mapped reads) values are shown for transcripts from Resch *et al.* and Labbé *et al.* in stem cells, progeny, and differentiated tissues. Labbé *et al.* classified some of the genes into their stem cell enriched (SC-enriched) or stem cell and progeny (SC+prog) groups.

**Table S2: Summary of RNAi phenotypes and penetrance**

**SET1/MLL family regeneration experiments**

| <i>Smed-set1(RNAi)</i> - 3 dsRNA feedings, 5 expts.                           |                           |
|-------------------------------------------------------------------------------|---------------------------|
| reduced blastema size                                                         | n = 18/36 trunks          |
| no photoreceptors                                                             | n = 10/36 trunks          |
| underdeveloped/delayed photoreceptors                                         | n = 27/36 trunks          |
| lesions                                                                       | n = 3/47 heads or trunks  |
| ventral curling                                                               | n = 8/47 heads or trunks  |
| lysis                                                                         | n = 25/72 heads or trunks |
| note: photoreceptors developed near amputation site or in pre-existing tissue |                           |

| <i>Smed-ml1/2(RNAi)</i> - 6 dsRNA feedings, 3 expts. |                  |
|------------------------------------------------------|------------------|
| underdeveloped photoreceptors                        | n = 40/40 trunks |
| no movement/inching                                  | n = 40/40 trunks |
| flat/ruffled appearance                              | n = 40/40 trunks |

| <i>Smed-trr-1(RNAi)</i> - 6 dsRNA feedings, 3 expts.                          |                  |
|-------------------------------------------------------------------------------|------------------|
| reduced blastema size                                                         | n = 50/50 trunks |
| underdeveloped photoreceptors                                                 | n = 23/50 trunks |
| delayed photoreceptors                                                        | n = 27/50 trunks |
| note: photoreceptors developed near amputation site or in pre-existing tissue |                  |

| <i>Smed-trr-2(RNAi)</i> - 6 dsRNA feedings, 2 expts. |                  |
|------------------------------------------------------|------------------|
| normal                                               | n = 30/30 trunks |

| <i>Smed-trr-2(RNAi)</i> - 9 dsRNA feedings, 1 expt. |                  |
|-----------------------------------------------------|------------------|
| normal                                              | n = 10/10 trunks |

| <i>Smed-ml15-1(RNAi)</i> - 6 dsRNA feedings, 2 expts. |                  |
|-------------------------------------------------------|------------------|
| normal                                                | n = 30/30 trunks |

| <i>Smed-ml15-1(RNAi)</i> - 9 dsRNA feedings, 1 expt. |                  |
|------------------------------------------------------|------------------|
| normal                                               | n = 10/10 trunks |

| <i>Smed-ml15-2(RNAi)</i> - 6 dsRNA feedings, 3 expts. |                  |
|-------------------------------------------------------|------------------|
| normal                                                | n = 1/50 trunks  |
| underdeveloped photoreceptors                         | n = 37/50 trunks |
| delayed photoreceptors                                | n = 12/50 trunks |

**Double knockdown regeneration experiments**

| <i>gfp(RNAi)/Smed-trr-1(RNAi)</i> - 6 dsRNA feedings, 1 expt.                 |                  |
|-------------------------------------------------------------------------------|------------------|
| reduced blastema size                                                         | n = 9/10 trunks  |
| delayed photoreceptors                                                        | n = 10/10 trunks |
| note: photoreceptors developed near amputation site or in pre-existing tissue |                  |

| <i>gfp(RNAi)/Smed-trr-2(RNAi)</i> - 6 dsRNA feedings, 1 expt. |                  |
|---------------------------------------------------------------|------------------|
| normal                                                        | n = 10/10 trunks |

| <i>Smed-trr-1(RNAi)/Smed-trr-2(RNAi)</i> - 6 dsRNA feedings, 1 expt.          |                           |
|-------------------------------------------------------------------------------|---------------------------|
| reduced blastema size                                                         | n = 10/10 trunks          |
| no photoreceptors                                                             | n = 8/10 trunks           |
| underdeveloped photoreceptors                                                 | n = 2/10 trunks           |
| ventral curling                                                               | n = 1/3 trunks            |
| lysis                                                                         | n = 17/20 heads or trunks |
| note: photoreceptors developed near amputation site or in pre-existing tissue |                           |

| <i>gfp(RNAi)/Smed-ml15-1(RNAi)</i> - 6 dsRNA feedings, 1 expt. |                  |
|----------------------------------------------------------------|------------------|
| normal                                                         | n = 10/10 trunks |

| <i>gfp(RNAi)/Smed-ml15-2(RNAi)</i> - 6 dsRNA feedings, 1 expt. |                 |
|----------------------------------------------------------------|-----------------|
| normal                                                         | n = 4/10 trunks |
| underdeveloped photoreceptors                                  | n = 3/10 trunks |
| delayed photoreceptors                                         | n = 3/10 trunks |

| <i>Smed-ml15-1(RNAi)/Smed-ml15-2(RNAi)</i> - 6 dsRNA feedings, 1 expt. |                 |
|------------------------------------------------------------------------|-----------------|
| normal                                                                 | n = 6/10 trunks |
| delayed photoreceptors                                                 | n = 4/10 trunks |

**COMPASS and COMPASS-like regeneration experiments**

| <i>Smed-ash2(RNAi)</i> - 6 dsRNA feedings, 2 expts. |                           |
|-----------------------------------------------------|---------------------------|
| reduced blastema size                               | n = 30/30 trunks          |
| no photoreceptors                                   | n = 26/30 trunks          |
| underdeveloped photoreceptors                       | n = 4/30 trunks           |
| ventral curling                                     | n = 10/13 heads or trunks |
| head regression                                     | n = 2/13 heads or trunks  |
| lysis                                               | n = 47/60 heads or trunks |

| <i>Smed-dpy30-1(RNAi)</i> - 6 dsRNA feedings, 2 expts. |                  |
|--------------------------------------------------------|------------------|
| normal regeneration                                    | n = 20/20 trunks |
| inching movement                                       | n = 20/20 trunks |

| <i>Smed-dpy30-2(RNAi)</i> - 6 dsRNA feedings, 2 expts.                                                                                             |                  |
|----------------------------------------------------------------------------------------------------------------------------------------------------|------------------|
| normal                                                                                                                                             | n = 14/40 trunks |
| reduced blastema size                                                                                                                              | n = 3/40 trunks  |
| underdeveloped photoreceptors                                                                                                                      | n = 13/40 trunks |
| delayed photoreceptors                                                                                                                             | n = 13/40 trunks |
| ectopic photoreceptor                                                                                                                              | n = 2/40 trunks  |
| note: ectopic photoreceptors formed between the normal ones and were confirmed by staining with VC-1 antibody, which detects photoreceptor neurons |                  |

| <i>Smed-rbbp5(RNAi)</i> - 6 dsRNA feedings, 2 expts. |                           |
|------------------------------------------------------|---------------------------|
| reduced blastema size                                | n = 30/30 trunks          |
| no photoreceptors                                    | n = 25/30 trunks          |
| delayed/underdeveloped photoreceptors                | n = 4/30 trunks           |
| lesions                                              | n = 2/36 heads or trunks  |
| ventral curling                                      | n = 22/36 heads or trunks |
| head regression                                      | n = 10/36 heads or trunks |
| lysis                                                | n = 24/60 heads or trunks |

| <i>Smed-wdr5(RNAi)</i> - 6 dsRNA feedings, 2 expts. |                  |
|-----------------------------------------------------|------------------|
| reduced blastema size                               | n = 30/30 trunks |
| underdeveloped photoreceptors                       | n = 30/30 trunks |
| head regression                                     | n = 7/30 trunks  |
| lysis                                               | n = 1/30 heads   |
|                                                     | n = 0/30 trunks  |

| <i>Smed-cxxc1(RNAi)</i> - 6 dsRNA feedings, 2 expts. |                  |
|------------------------------------------------------|------------------|
| delayed photoreceptors                               | n = 30/30 trunks |

| <i>Smed-wdr82-1(RNAi)</i> - 6 dsRNA feedings, 2 expts. |                  |
|--------------------------------------------------------|------------------|
| normal                                                 | n = 10/10 trunks |

| <i>Smed-wdr82-2(RNAi)</i> - 6 dsRNA feedings, 2 expts. |                           |
|--------------------------------------------------------|---------------------------|
| reduced blastema size                                  | n = 28/30 trunks          |
| no photoreceptors                                      | n = 26/30 trunks          |
| delayed/underdeveloped photoreceptors                  | n = 4/30 trunks           |
| lesions                                                | n = 7/50 heads or trunks  |
| head regression                                        | n = 6/50 heads or trunks  |
| ventral curling                                        | n = 18/50 heads or trunks |
| lysis                                                  | n = 10/60 heads or trunks |

| <i>Smed-hcf1(RNAi)</i> - 6 dsRNA feedings, 2 expts. |                           |
|-----------------------------------------------------|---------------------------|
| reduced blastema size                               | n = 30/30 trunks          |
| no photoreceptors                                   | n = 30/30 trunks          |
| curling                                             | n = 5/7 heads or trunks   |
| lysis                                               | n = 53/60 heads or trunks |

| <i>Smed-menin(RNAi)</i> - 6 dsRNA feedings, 2 expts. |                  |
|------------------------------------------------------|------------------|
| normal                                               | n = 10/10 trunks |

| <i>Smed-ptip(RNAi)</i> - 6 dsRNA feedings, 2 expts. |                  |
|-----------------------------------------------------|------------------|
| reduced blastema size                               | n = 30/30 trunks |
| underdeveloped photoreceptors                       | n = 30/30 trunks |
| lesions                                             | n = 5/30 heads   |
|                                                     | n = 1/30 trunks  |

| <i>Smed-utx(RNAi)</i> - 6 dsRNA feedings, 2 expts. |                  |
|----------------------------------------------------|------------------|
| reduced blastema size                              | n = 30/30 trunks |
| underdeveloped photoreceptors                      | n = 30/30 trunks |
| freckled blastema                                  | n = 30/30 trunks |
| head regression                                    | n = 8/30 trunks  |
| curling                                            | n = 1/30 trunks  |

## Homeostasis experiments

| <i>Smed-set1(RNAi)</i> - 4 feedings, 4 expts. |                   |
|-----------------------------------------------|-------------------|
| normal                                        | n = 120/141 worms |
| head regression                               | n = 10/141 worms  |
| lesions                                       | n = 8/141 worms   |
| curling                                       | n = 2/141 worms   |

| <i>Smed-set1(RNAi)</i> - 5 feedings, 1 expt. |                 |
|----------------------------------------------|-----------------|
| normal                                       | n = 2/50 worms  |
| head regression                              | n = 46/50 worms |
| lesions                                      | n = 6/50 worms  |
| curling                                      | n = 15/50 worms |
| lysis                                        | n = 1/50 worms  |

| <i>Smed-mil1/2(RNAi)</i> - 9 feedings, 1 expts. |                 |
|-------------------------------------------------|-----------------|
| no movement/inching                             | n = 29/29 worms |
| head regression                                 | n = 2/29 worms  |
| edema                                           | n = 3/29 worms  |

| <i>Smed-trr-2(RNAi)</i> - 9 feedings, 2 expts. |                 |
|------------------------------------------------|-----------------|
| normal                                         | n = 25/49 worms |
| reduced size                                   | n = 4/49 worms  |
| lysed                                          | n = 20/49 worms |

Phenotypes observed following knockdown of each gene and how often they occurred. Animals were fed dsRNA targeting each gene the indicated number of times over the stated number of experiments (expts.). Worms in homeostasis experiments were left intact; all others were amputated anterior to the pharynx and scored during 10-14 days of regeneration. “Underdeveloped photoreceptors” refers to cases where the photoreceptors never fully developed (i.e., were smaller or less pigmented than controls throughout the experiment). “Delayed photoreceptors” were initially abnormal but were indistinguishable from controls by day 10-14. Lesions, head regression, and ventral curling categories only include worms that were alive at the end of the experiment; some worms that lysed displayed these phenotypes first.

Table S3: Accession numbers and primers

## Genbank accession numbers of cloned insert sequences

| clone                         | accession number(s)          |
|-------------------------------|------------------------------|
| <i>Smed-set1</i>              | DN301487, DN308184           |
| <i>Smed-ml1/2</i>             | KC262346                     |
| <i>Smed-trr-1</i>             | KC262345                     |
| <i>Smed-trr-2</i>             | DN309269, HO004937           |
| <i>Smed-ml15-1</i>            | DN314063, HO006509           |
| <i>Smed-ml15-2</i>            | KC262344                     |
| <i>Smed-ash2</i>              | DN296978, DN305606, KC262336 |
| <i>Smed-dpy30-1</i> RNAi      | KC262337                     |
| <i>Smed-dpy30-1</i> riboprobe | KC262338                     |
| <i>Smed-rbbp5</i>             | DN308991, HO007192           |
| <i>Smed-wdr5</i>              | DN315983, HO007009           |
| <i>Smed-cxxc1</i>             | DN310044, HO005298           |

| clone               | accession number(s)          |
|---------------------|------------------------------|
| <i>Smed-wdr82-1</i> | DN297595, DN305959           |
| <i>Smed-wdr82-2</i> | KC262342                     |
| <i>Smed-hcf1</i>    | KC262343                     |
| <i>Smed-menin</i>   | KC262339                     |
| <i>Smed-ptip</i>    | DN315791, HO008340, KC262340 |
| <i>Smed-utx</i>     | KC262341                     |
| <i>EGFR-5</i>       | KC262347                     |
| <i>inx10</i>        | KC262348                     |
| <i>Smedwi-1</i>     | DN309285, HO004953           |
| <i>NB.32.1g</i>     | DN298711, DN306632           |
| <i>agat-1</i>       | DN290976, DN303276           |

## Sequences below Genbank's 200bp cutoff

|                               |                                                                                                                                                                                                                                                        |
|-------------------------------|--------------------------------------------------------------------------------------------------------------------------------------------------------------------------------------------------------------------------------------------------------|
| <i>Smed-dpy30-2</i> RNAi      | > <i>Schmidtea mediterranea Smed-dpy30-2</i> partial cDNA<br>CAGCCAGGAATTCAATCGGATTATTCGGTCGTTGTTTGGCAGAACTTTAAACCACTAAGAACAACAGGTACAACAGTCTGATCTAAATATACTCTTGCCGATAA<br>ATTCTGTAAATTGCATCAGAACAGAACCCCTTGGAATTATC                                     |
| <i>Smed-dpy30-2</i> riboprobe | > <i>Schmidtea mediterranea Smed-dpy30-2</i> partial cDNA<br>TCATGGCTGAAGAAAACGGTACAAAATACAGATATAATGATAAATCCAAGGGTCTGTTCTGATGCAAATTTACAGAATTTATCGGCAAGAGTATATTTAGATC<br>AGACTGTTGACCTGTTGTTCTTAGTGGTTTTAAAGTCTGGCAAAACACGACCGAATAATCCGATTGAATTCCTGGCTG |

## Primers used for cloning, with restriction sites underlined

| clone                         | forward primer                                   | reverse primer                               |
|-------------------------------|--------------------------------------------------|----------------------------------------------|
| <i>Smed-ml1/2</i>             | T7 universal - amplified from cDNA cloned in pBS | ATAAGAATGCGGCCGCCATACCGTTGCGTAGATTCCG        |
| <i>Smed-trr-1</i>             | T7 universal - amplified from cDNA cloned in pBS | ATAAGAATGCGGCCGCCGCTACCTCGTTCCGAATCAAC       |
| <i>Smed-ml15-2</i>            | CCGCTCGAGTACTGGCGGTTGCTAGCTAAGAT                 | ATAAGAATGCGGCCGCCGCTCGATTGAACGTTGCACTGCTGG   |
| <i>Smed-dpy30-1</i> RNAi      | GAAATTGAATTGCCAACTAGTG                           | ATAAGAATGCGGCCGCCCATATATTCAATTGGATTGGCGCGTC  |
| <i>Smed-dpy30-1</i> riboprobe | GAAATTGAATTGCCAACTAGTG                           | ATAAGAATGCGGCCGCCCATCACATAGATTCATAGGCA       |
| <i>Smed-dpy30-2</i> RNAi      | CCGCTCGAGGATAAAATCCAAGGGTCTGG                    | CAGCCAGGAATTCAATCGGATTATTC                   |
| <i>Smed-dpy30-2</i> riboprobe | TCATGGCTGAAGAAAACGGTAC                           | CAGCCAGGAATTCAATCGGATTATTC                   |
| <i>Smed-wdr82-2</i>           | CCGCTCGAGCGTCTAATACTGTATTATCATGCTTCCAC           | ATAAGAATGCGGCCGCCGCAAAATTCGGGTTGAACGCAACG    |
| <i>Smed-hcf1</i>              | CCGCTCGAGTTCGAGCCAACCTATTGCAACC                  | ATAAGAATGCGGCCGCCGCTATGGCACTTGGAGCTCCTGAAAA  |
| <i>Smed-menin</i>             | CCGCTCGAGAGCAATAACGAGCAGTTGGG                    | ATAAGAATGCGGCCGCCGCAACGGTAGCTTAATGGCAGGAACG  |
| <i>Smed-utx</i>               | CCGCTCGAGGGCTGCTTGGACAAATCTTGGTGT                | ATAAGAATGCGGCCGCCGCGCAGAGTTGAGGCAACGAGTTTCA  |
| <i>EGFR-5</i>                 | CCGCTCGAGTGCCTAAGATGCAACACGCCAAG                 | ATAAGAATGCGGCCGCCGCTCTGACCATGTGCTCCAGTTTGA   |
| <i>inx10</i>                  | CCGCTCGAGATTAGCAGCGCTCAAGACCCGAAT                | ATAAGAATGCGGCCGCCGCAAAACAGAATCAGCTGAAACGTGGA |
| LIC-BSins                     | GATGGTAGTAGGCCCTCGAGGTCGACGGTATCGATA             | GATGGTAGTAGGCAACAAAAGCTGGAGCTCCAC            |
| LIC-pJC532vec                 | CCTACTACCATCGCACAGGTATTATTTCGGCGCAAAGC           | CCTACTACCATCGCTGCAGGTGCATACAGTAGAAACTCG      |

## qPCR primers

| target                | forward primer           | reverse primer             |
|-----------------------|--------------------------|----------------------------|
| <i>Smed-set1</i>      | ATGCCATTGGTCCCACACT      | TTGTTCTGAGCGCGCTTCTTT      |
| <i>Smed-ml1/2</i>     | AAATTCACAAGACGCGTGTGACC  | TCTGGCGATATGATCGGGTTTGGT   |
| <i>Smed-trr-1</i>     | TTGAATCGTTCGCGGGCTTAGAGA | CCGCTCATATTAATCGGGAGTGGCAT |
| <i>Smed-trr-2</i>     | ATCACGACGCGTCAACTCATCGAA | TTCCGGCAATTGATTATCCGCAC    |
| <i>Smed-ml15-1</i>    | ATGTGCTGTGGTCACCCGAATTG  | AGCGTCGATTATCATCCAACGGAGA  |
| <i>Smed-ml15-2</i>    | ATGCGGGAAATGTTTCCGGTCTGA | CGCCACATCGGTGAATGATTCCAT   |
| <i>Smedwi-1</i>       | GAAACGTGAGCCTAGAGAACG    | TACACATCCCCAGCTCTTC        |
| <i>Smed-β-tubulin</i> | TGGCTGCTGTGATCCAAGA      | AAATTGCCGCAACAGTCAAATA     |
